# Supplementary material
Source: Royal Society of Chemistry journal article supplement (doi:10.1039/d6ay00057f)
Supplement: d6ay00057f1.pdf [file d6ay00057f1.pdf]

**Supplemental Table 1.** Recovery and matrix effect results of TMS-007 in different matrices.

| QC level | Plasma         |        |                     |        | Brain homogenate |        |                     |        |
|----------|----------------|--------|---------------------|--------|------------------|--------|---------------------|--------|
|          | Recovery (n=6) |        | Normalized MF (n=6) |        | Recovery (n=6)   |        | Normalized MF (n=6) |        |
|          | Mean ± SD (%)  | CV (%) | Mean ± SD (%)       | CV (%) | Mean ± SD (%)    | CV (%) | Mean ± SD (%)       | CV (%) |
| LQC      | 90.0 ± 8.9     | 9.9    | 111.0 ± 8.7         | 7.8    | 72.4 ± 3.3       | 4.6    | 116.8 ± 12.5        | 10.7   |
| MQC      | 95.9 ± 4.8     | 5.0    | 107.8 ± 2.7         | 2.5    | 77.2 ± 3.2       | 4.1    | 118.9 ± 7.2         | 6.0    |
| HQC      | 97.9 ± 7.5     | 7.6    | 102.9 ± 2.7         | 2.6    | 73.2 ± 3.0       | 4.1    | 114.3 ± 9.2         | 8.1    |

QC: quality control, LQC: low quality control, MQC: medium quality control, HQC: high quality control, Normalized MF: normalized matrix effect factor, SD: standard deviation, CV: coefficient of variance, n: number of replicates.

**Supplemental Table 2.** Recovery and matrix effect results of propranolol in different matrices.

| Plasma             |        |                         |        | □ | Brain homogenate   |        |                         |        | □ |
|--------------------|--------|-------------------------|--------|---|--------------------|--------|-------------------------|--------|---|
| Recovery<br>(n=18) |        | Matrix Effect<br>(n=18) |        |   | Recovery<br>(n=18) |        | Matrix Effect<br>(n=18) |        |   |
| Mean ± SD (%)      | CV (%) | Mean ± SD (%)           | CV (%) |   | Mean ± SD (%)      | CV (%) | Mean ± SD (%)           | CV (%) | □ |
| 98.6 ± 3.6         | 3.7    | 96.6 ± 1.4              | 1.4    |   | 104.1 ± 5.1        | 4.9    | 98.5 ± 2.0              | 2.1    |   |

SD: standard deviation, CV: coefficient of variance, n: number of replicates.

**Supplemental Table 3.** Stability result of TMS-007 in different matrices under various conditions (n=3).

| Biological matrix        | Storage condition                                  | LQC                    |                             | HQC    |        |                        |                        |        |        |
|--------------------------|----------------------------------------------------|------------------------|-----------------------------|--------|--------|------------------------|------------------------|--------|--------|
|                          |                                                    | Norminal concentration | Mean measured concentration | RE (%) | CV (%) | Norminal concentration | Measured concentration | RE (%) | CV (%) |
| Plasma (ng/mL)           | Short-term stability; RT, 8 h                      | 30.0                   | 30.2                        | 0.8    | 2.7    | 8000                   | 7097                   | -11.3  | 2.4    |
|                          | Post-processed stability in autosampler; 4 °C, 3 d |                        | 30.9                        | 2.9    | 3.2    |                        | 8188                   | 2.4    | 4.0    |
|                          | Freeze-thaw cycle stability; -70 °C, 3 cycles      |                        | 29.7                        | -0.9   | 4.5    |                        | 7033                   | -12.1  | 5.3    |
|                          | Long-term stability; -70 °C, 7 d                   |                        | 30.4                        | 1.2    | 4.2    |                        | 7107                   | -11.2  | 4.0    |
| Brain homogenate (ng/mL) | Short-term stability; RT, 8 h                      | 30.0                   | 31.8                        | 6.1    | 4.6    | 8000                   | 7162                   | -10.5  | 5.7    |
|                          | Post-processed stability in autosampler; 4 °C, 3 d |                        | 31.6                        | 5.2    | 7.5    |                        | 9013                   | 12.7   | 3.2    |
|                          | Freeze-thaw cycle stability; -70 °C, 3 cycles      |                        | 30.6                        | 1.9    | 2.8    |                        | 7167                   | -10.4  | 6.3    |
|                          | Long-term stability; -70 °C, 7 d                   |                        | 26.2                        | -12.8  | 14.8   |                        | 6873                   | -14.1  | 7.8    |

LQC: low quality control, HQC: high quality control, RE: relative error, CV: coefficient of variance, RT: room temperature, n: number of replicates.
